# Supplementary material
Source: MDPI journal article supplement (https://www.mdpi.com/2075-4701/10/7/925)
Supplement: s1 [file s1]

## Sheet: ParaMolK 2.0
	Determination of kinetic parameters
	Ore:	Quartz		From:	Valle Fértil (Argentina)
	Size interval:
	x max. [micr.] =	840	x min. [micr.] =	74
	Parameters:
	C =	0.000408917	n =	1.09598
	Yellow: results
	Light Green: input data
									R2 =	0.990153
Particle size [mesh]	Particle size [microns]	Grinding time [min.]							Y-axis intercept =	-7.802
		0	5	0	5	0	5
		Retained [g]		Retained [W(x,t)] [f.dec.]		Ln W(x,t)-Ln W(x,0)		k	Ln x	LN k
6	3360
8	2380	87.36	2.76	0.271161	0.00865529	0	-3.44454	0.688908	7.77486	-0.372647
10	2000	35.36	1.97	0.380917	0.0148332	0	-3.24572	0.649143	7.6009	-0.432102
14	1410	54.32	3.6	0.549524	0.0261227	0	-3.04625	0.60925	7.25134	-0.495527
20	840	47.53	5.83	0.697054	0.0444054	0	-2.7535	0.5507	6.7334	-0.596564
30	590	27.46	10.59	0.782289	0.0776154	0	-2.31046	0.462092	6.38012	-0.771992
40	420	20.24	24.3	0.845113	0.15382	0	-1.70369	0.340738	6.04025	-1.07664
50	297	14.63	41.82	0.890524	0.284966	0	-1.13944	0.227888	5.69373	-1.4789
70	210	11.72	49.54	0.926902	0.440322	0	-0.744341	0.148868	5.34711	-1.90469
100	149	7.96	42.35	0.951609	0.573131	0	-0.50704	0.101408	5.00395	-2.2886
140	105	5.81	40.74	0.969643	0.700891	0	-0.324576	0.0649153	4.65396	-2.73467
200	74	4.92	31.03	0.984915	0.7982	0	-0.210196	0.0420392	4.30407	-3.16915
270	53	2.91	24.44	0.993947	0.874843	0	-0.12764	0.0255279	3.97029	-3.66798
325	44	1.04	10.78	0.997175	0.908649	0	-0.0929678	0.0185936	3.78419	-3.98494
400	37	0.83	14.32	0.999752	0.953556	0	-0.0473086	0.00946171	3.61092	-4.6605
Fondo	0	0.08	14.81	1	1	0	0
		322.17	318.88

## Sheet: Siim 2.0
						SIMULATION OF BOND BALL GRINDABILITY TEST
	Ore	Quartz		From:	Valle Fértil (Argentina)			Feed
								Size [micr.]	Retained, intervalo [g.]	Retained, interval [%]	Cumulative retained [%]	Cumulative undersize [%]
	Kinetic parameters		C =	0.000408917	n =	1.09598
								3360	0	0	0	100
		Reference size (mm) =	149		Recirculating load 250 % [g] =	344.343		2380	75.3	25.0249	25.0249	74.9751
								2000	31.4	10.4354	35.4603	64.5397
		Initial load (g) =	1205.2		Fines % =	4.95181		1410	53	17.6138	53.0741	46.9259
								840	52.2	17.348	70.4221	29.5779
		F80 =	2572.22		P80 =	118.049		590	25	8.30841	78.7305	21.2695
								420	18.4	6.11499	84.8455	15.1545
		Recirculating load [%]	249.997		wi Bond =	13.88		297	13.6	4.51977	89.3652	10.6348
								210	10.4	3.4563	92.8215	7.17846
		Wi simulated [KWh/t]	14.0955	KWh/t	Diff. %	-1.55233		149	6.7	2.22665	95.0482	4.95181
								105	5.5	1.82785	96.876	3.12396
		Grindability Gpb [g/rev]	1.48236	g/rev	Period	6		74	3.6	1.19641	98.0724	1.92755
	convergence		0.0001	1				53	2.7	0.897308	98.9698	1.03024
	Yellow: results							37	1.7	0.564972	99.5347	0.465271
	Light Green: input data							0	1.4	0.465271	100	-3.68594e-14
									300.9	100
								Feed F80:	80	2572.22
	SIMULATOR MCA
	Period	Time [min]	mill revolutions	Reject [%]	Reject [g]	Undersize [g]	Undersize in feed [g]	Net undersize [g]	Grindability Gpb [g/rev]	Recirculating load [%]	wi simulated [KWh/t]	P80	Diff. %
	1	2.85714	200	71.7348	864.547	340.653	59.6792	280.973	1.40487	253.792	14.7877	118.777	-6.53959
	2	3.45305	241.713	70.1737	845.734	359.466	4.76791	354.698	1.46743	235.275	14.1956	117.822	-2.27346
	3	3.30055	231.039	71.1798	857.859	347.341	5.3091	342.031	1.48041	246.979	14.1082	118.015	-1.64376
	4	3.27502	229.252	71.3951	860.454	344.746	4.95697	339.789	1.48217	249.591	14.0967	118.045	-1.56103
	5	3.27185	229.029	71.4252	860.816	344.384	4.88319	339.501	1.48235	249.958	14.0955	118.048	-1.55287
	6	3.27155	229.009	71.4283	860.854	344.346	4.87293	339.473	1.48236	249.997	14.0955	118.049	-1.55233
	0	0	0	0	0	0	4.87186	0	0	0	0	0	0
	0	0	0	0	0	0	0	0	0	0	0	0	0
	0	0	0	0	0	0	0	0	0	0	0	0	0
	0	0	0	0	0	0	0	0	0	0	0	0	0
	PSD, feed
	Particle size [microns]	Cummulative oversize, period 2 [%]	Cummulative oversize, period 3 [%]	Cummulative oversize, period 4 [%]	Cummulative oversize, period 5 [%]	Cummulative oversize, period 6 [%]	Cummulative oversize, period 7 [%]	Cummulative oversize, period 8 [%]	Cummulative oversize, period 9 [%]	Cummulative oversize, period 10 [%]
	3360	0	0	0	0	0	0	0	0	0
	2380	7.14438	7.46997	7.22076	7.16704	7.15951	7.15872	7.51278	7.53031	7.53118
	2000	10.3015	10.6059	10.259	10.183	10.1723	10.1712	10.6729	10.6977	10.6989
	1410	16.9511	16.1426	15.6511	15.5364	15.5191	15.5172	16.2681	16.3053	16.3071
	840	30.727	24.1993	23.0765	22.8407	22.7975	22.7907	23.7871	23.8364	23.8389
	590	44.3269	33.015	30.2888	29.5716	29.3907	29.3469	30.4608	30.516	30.5187
	420	59.3086	45.876	41.1254	39.3336	38.6659	38.4197	39.6201	39.6795	39.6825
	297	74.3372	62.6821	57.1218	54.3005	52.8724	52.1523	53.4167	53.4793	53.4824
	210	87.8436	81.2114	77.3308	74.8908	73.359	72.4	73.7133	73.7783	73.7815
	149	98.6004	98.5231	98.5729	98.5835	98.585	98.5852	99.9299	99.9965	99.9998
	105	99.117	99.0682	99.0997	99.1064	99.1073	99.1074	99.9558	99.9978	99.9999
	74	99.4552	99.4251	99.4445	99.4486	99.4492	99.4493	99.9727	99.9986	99.9999
	53	99.7088	99.6927	99.7031	99.7053	99.7056	99.7056	99.9854	99.9993	100
	37	99.8685	99.8612	99.8659	99.8669	99.867	99.8671	99.9934	99.9997	100
	0	100	100	100	100	100	100	100	100	100
	PSD, product
	Particle size [microns]	Cummulative oversize, period 1 [%]	Cummulative oversize, period 2 [%]	Cummulative oversize, period 3 [%]	Cummulative oversize, period 4 [%]	Cummulative oversize, period 5 [%]	Cummulative oversize, period 6 [%]	Cummulative oversize, period 7 [%]	Cummulative oversize, period 8 [%]	Cummulative oversize, period 9 [%]	Cummulative oversize, period 10 [%]
	3360	0	0	0	0	0	0	0	0	0	0
	2380	0.0710329	0.0059683	0.00853381	0.00869289	0.00868461	0.00868076	7.15872	7.51278	7.53031	7.53118
	2000	0.278559	0.0294495	0.0392707	0.0396672	0.0395861	0.0395642	10.1712	10.6729	10.6977	10.6989
	1410	1.94958	0.31259	0.35509	0.354595	0.353289	0.353018	15.5172	16.2681	16.3053	16.3071
	840	10.822	3.195	2.78078	2.69652	2.67452	2.66998	22.7907	23.7871	23.8364	23.8389
	590	22.0736	9.53263	7.59859	7.05081	6.89357	6.8523	29.3469	30.4608	30.516	30.5187
	420	35.3269	20.5698	16.6728	15.0637	14.4214	14.1779	38.4197	39.6201	39.6795	39.6825
	297	49.078	36.0278	31.3666	28.7377	27.3365	26.6192	52.1523	53.4167	53.4793	53.4824
	210	61.6074	53.5262	50.5795	48.3393	46.8354	45.8794	72.4	73.7133	73.7783	73.7815
	149	71.7348	70.1737	71.1798	71.3951	71.4252	71.4283	98.5852	99.9299	99.9965	99.9998
	105	79.9719	78.614	79.3837	79.545	79.5674	79.5697	99.1074	99.9558	99.9978	99.9999
	74	86.0584	84.9253	85.4938	85.6104	85.6264	85.628	99.4493	99.9727	99.9986	99.9999
	53	90.3933	89.3628	89.7817	89.8638	89.8748	89.876	99.7056	99.9854	99.9993	100
	37	93.632	92.7557	93.0521	93.1073	93.1146	93.1153	99.8671	99.9934	99.9997	100
	0	100	100	100	100	100	100	100	100	100	100
	P80 and other calculations
Period 1				Period 2					Period 3					Period 4
Product				Feed		Product			Feed		Product			Feed		Product
Particle size [microns]	Feed [g]	Retained, interval [%]	Retained, cummulative [%]	Feed [g]	Retained, interval [%]	Retained, interval [g]	Retained, interval [%]	Retained, cummulative [%]	Feed [g]	Retained, interval [%]	Retained, interval [g]	Retained, interval [%]	Retained, cummulative [%]	Feed [g]	Retained, interval [%]	Retained, interval [g]	Retained, interval [%]	Retained, cummulative [%]
3360	0	0	100	0	0	0	0	100	0	0	0	0	100	0	0	0	0	100
2380	0.856089	0	100	86.1041	7.14438	0.07193	0	100	90.0281	7.46997	0.102849	0	100	87.0246	7.22076	0.104767	0	100
2000	2.5011	0	100	38.0494	3.1571	0.282995	0	100	37.7946	3.13596	0.370441	0	100	36.6167	3.03822	0.373303	0	100
1410	20.1391	0	100	80.1411	6.64961	3.41241	0	100	66.7281	5.53669	3.80626	0	100	64.9862	5.39215	3.79551	0	100
840	106.931	0	100	166.027	13.7759	34.7388	0	100	97.0988	8.05665	29.2345	0	100	89.4909	7.4254	28.2249	0	100
590	135.604	0	100	163.907	13.6	76.3812	0	100	106.247	8.81572	58.0642	0	100	86.9226	7.2123	52.4779	0	100
420	159.728	0	100	180.559	14.9817	133.02	0	100	155.001	12.861	109.362	0	100	130.602	10.8365	96.5713	0	100
297	165.728	0	100	181.125	15.0286	186.3	0	100	202.547	16.8061	177.09	0	100	192.789	15.9965	164.799	0	100
210	151.005	0	100	162.779	13.5064	210.89	0	100	223.314	18.5292	231.553	0	100	243.558	20.209	236.239	0	100
149	122.055	0	100	129.64	10.7567	200.636	0	100	208.64	17.3117	248.276	0	100	256.01	21.2421	277.869	0	100
105	99.2737	99.2737	70.8578	6.22662	0.516646	101.722	101.722	71.7019	6.5705	0.545179	98.8724	98.8724	71.5345	6.34886	0.526789	98.2225	98.2225	71.5087
74	73.3551	73.3551	49.3241	4.0756	0.338168	76.0633	76.0633	50.5418	4.30069	0.356845	73.6395	73.6395	50.3335	4.15562	0.344807	73.0998	73.0998	50.3048
53	52.2437	52.2437	33.9877	3.0567	0.253626	53.481	53.481	35.6639	3.22552	0.267633	51.6776	51.6776	35.4554	3.11671	0.258606	51.2619	51.2619	35.4353
37	39.0328	39.0328	22.5295	1.92459	0.159691	40.8914	40.8914	24.2883	2.03088	0.16851	39.4148	39.4148	24.1078	1.96238	0.162826	39.0909	39.0909	24.0963
0	76.7471	76.7471	0	1.58496	0.13151	87.3083	87.3083	0	1.67249	0.138773	83.7362	83.7362	0	1.61607	0.134092	83.0708	83.0708	0
	1205.2	340.653		1205.2	100	1205.2	359.466		1205.2	100	1205.2	347.341		1205.2	100	1205.2	344.746
P	80	118.777		Reference size:	149	P	80	117.822	Reference size:	149	P	80	118.015	Reference size:	149	P	80	118.045
Reference size:	149
	Period 5					Period 6					Period 7
	Feed		Product			Feed		Product			Feed		Product
Particle size [microns]	Feed [g]	Retained, interval [%]	Retained, interval [g]	Retained, interval [%]	Retained, cummulative [%]	Feed [g]	Retained, interval [%]	Retained, interval [g]	Retained, interval [%]	Retained, cummulative [%]	Feed [g]	Retained, interval [%]	Retained, interval [g]	Retained, interval [%]	Retained, cummulative [%]
3360	0	0	0	0	100	0	0	0	0	100	0	0	0	0	100
2380	86.3772	7.16704	0.104667	0	100	86.2865	7.15951	0.104621	0	100	86.2769	7.15872	86.2769	0	100
2000	36.3488	3.016	0.372425	0	100	36.3101	3.01279	0.372208	0	100	36.3059	3.01244	36.3059	0	100
1410	64.5185	5.35334	3.78075	0	100	64.4399	5.34682	3.77774	0	100	64.4302	5.34602	64.4302	0	100
840	88.0312	7.30428	27.9754	0	100	87.719	7.27837	27.924	0	100	87.661	7.27356	87.661	0	100
590	81.1208	6.7309	50.848	0	100	79.4608	6.59317	50.4053	0	100	79.015	6.55617	79.015	0	100
420	117.652	9.76207	90.7259	0	100	111.785	9.27522	88.2881	0	100	109.345	9.07275	109.345	0	100
297	180.381	14.9669	155.652	0	100	171.217	14.2065	149.942	0	100	165.506	13.7327	165.506	0	100
210	248.154	20.5903	235.001	0	100	246.904	20.4865	232.124	0	100	244.025	20.2477	244.025	0	100
149	285.545	23.6928	296.356	0	100	304.024	25.2261	307.916	0	100	315.584	26.1852	315.584	0	100
105	6.30144	0.522854	98.1297	98.1297	71.5057	6.29482	0.522305	98.1197	98.1197	71.5055	6.29412	0.522247	6.29412	6.29412	63.0872
74	4.12458	0.342232	73.0234	73.0234	50.3017	4.12025	0.341872	73.0152	73.0152	50.3014	4.11979	0.341835	4.11979	4.11979	38.9262
53	3.09343	0.256674	51.2022	51.2022	35.4339	3.09018	0.256404	51.1958	51.1958	35.4339	3.08984	0.256376	3.08984	3.08984	20.8054
37	1.94772	0.161609	39.0452	39.0452	24.0962	1.94567	0.16144	39.0403	39.0403	24.0963	1.94546	0.161422	1.94546	1.94546	9.39597
0	1.604	0.13309	82.9834	82.9834	0	1.60232	0.13295	82.9747	82.9747	0	1.60214	0.132936	1.60214	1.60214	0
	1205.2	100	1205.2	344.384		1205.2	100	1205.2	344.346		1205.2	100	1205.2	17.0514
	Reference size:	149	P	80	118.048	Reference size:	149	P	80	118.049	Reference size:	149	P	80	125.764
	Period 8					Period 9					Period 10
	Feed		Product			Feed		Product			Feed		Product
Particle size [microns]	Feed [g]	Retained, interval [%]	Retained, interval [g]	Retained, interval [%]	Retained, cummulative [%]	Feed [g]	Retained, interval [%]	Retained, interval [g]	Retained, interval [%]	Retained, cummulative [%]	Feed [g]	Retained, interval [%]	Retained, interval [g]	Retained, interval [%]	Retained, cummulative [%]
3360	0	0	0	0	100	0	0	0	0	100	0	0	0	0	100
2380	90.544	7.51278	90.544	0	100	90.7553	7.53031	90.7553	0	100	90.7657	7.53118	90.7657	0	100
2000	38.0853	3.16008	38.0853	0	100	38.1734	3.16739	38.1734	0	100	38.1778	3.16775	38.1778	0	100
1410	67.4336	5.59522	67.4336	0	100	67.5823	5.60756	67.5823	0	100	67.5897	5.60817	67.5897	0	100
840	90.619	7.519	90.619	0	100	90.7655	7.53116	90.7655	0	100	90.7728	7.53176	90.7728	0	100
590	80.4317	6.67372	80.4317	0	100	80.5018	6.67954	80.5018	0	100	80.5053	6.67983	80.5053	0	100
420	110.387	9.15927	110.387	0	100	110.439	9.16355	110.439	0	100	110.442	9.16376	110.442	0	100
297	166.277	13.7966	166.277	0	100	166.315	13.7998	166.315	0	100	166.317	13.7999	166.317	0	100
210	244.615	20.2966	244.615	0	100	244.644	20.299	244.644	0	100	244.645	20.2991	244.645	0	100
149	315.963	26.2167	315.963	0	100	315.982	26.2182	315.982	0	100	315.983	26.2183	315.983	0	100
105	0.311673	0.0258607	0.311673	0.311673	63.0872	0.0154335	0.00128057	0.0154335	0.0154335	63.0872	0.000764236	6.34115e-05	0.000764236	0.000764236	63.0872
74	0.204004	0.016927	0.204004	0.204004	38.9262	0.0101019	0.000838193	0.0101019	0.0101019	38.9262	0.000500227	4.15057e-05	0.000500227	0.000500227	38.9262
53	0.153003	0.0126952	0.153003	0.153003	20.8054	0.00757643	0.000628645	0.00757643	0.00757643	20.8054	0.00037517	3.11293e-05	0.00037517	0.00037517	20.8054
37	0.0963353	0.00799331	0.0963353	0.0963353	9.39597	0.00477034	0.000395813	0.00477034	0.00477034	9.39597	0.000236218	1.95999e-05	0.000236218	0.000236218	9.39597
0	0.079335	0.00658272	0.079335	0.079335	-1.59872e-14	0.00392852	0.000325964	0.00392852	0.00392852	0	0.000194533	1.61411e-05	0.000194533	0.000194533	0
	1205.2	100	1205.2	0.844351		1205.2	100	1205.2	0.0418107		1205.2	100	1205.2	0.00207038
	Reference size:	149	P	80	125.764	Reference size:	149	P	80	125.764	Reference size:	149	P	80	125.764
